# Supplementary material for: Incidence and Prevalence of Epilepsy in Japan: A Retrospective Analysis of Insurance Claims Data of 9,864,278 Insured Persons
Source: PubMed Central journal article supplement (PMC10751190; doi:10.2188/jea.je20220316), 2024-02-05
Supplement: je-34-070-s001.pdf [file je-34-070-s001.pdf]

**eTable 1.** List of ICD-10 codes related to epilepsy

| <b>ICD-10</b>                                                                  |       |
|--------------------------------------------------------------------------------|-------|
| <b>G40 Epilepsy</b>                                                            |       |
|                                                                                | G40.0 |
|                                                                                | G40.1 |
|                                                                                | G40.2 |
|                                                                                | G40.3 |
|                                                                                | G40.4 |
|                                                                                | G40.5 |
|                                                                                | G40.6 |
|                                                                                | G40.7 |
|                                                                                | G40.8 |
|                                                                                | G40.9 |
| <b>G41 Epilepsy status (condition)</b>                                         |       |
|                                                                                | G41.0 |
|                                                                                | G41.1 |
|                                                                                | G41.2 |
|                                                                                | G41.8 |
|                                                                                | G41.9 |
| <b>F80 Specific developmental disorders of conversation and language</b>       |       |
|                                                                                | F80.3 |
| <b>G09 Secondary / sequelae of central nervous system inflammatory disease</b> |       |
| <b>T90 Secondary / sequelae of head injury</b>                                 |       |
|                                                                                | T90.5 |

ICD-10, International Classification of Diseases, 10th revision.

**eTable 2.** List of Japan's original code of medical billing for medical practice for epilepsy patients

| <b>Medical practice</b>                                                                 | <b>Japan's original code for medical practice</b> |
|-----------------------------------------------------------------------------------------|---------------------------------------------------|
| <b>B001_6 Epilepsy guidance fee</b>                                                     | 113002850                                         |
| <b>C110_3 Home vagus nerve electrical stimulation treatment guidance management fee</b> | 114021610                                         |

**eTable 3.** List of antiseizure medicine

| <b>Drug classification</b>                 | <b>The Anatomical Therapeutic Chemical (ATC) Classification Code</b> |
|--------------------------------------------|----------------------------------------------------------------------|
| <b>1131 Phenasemide preparations</b>       | N03AX13                                                              |
| <b>1132 Hydantoin preparations</b>         | N03AB01                                                              |
|                                            | N03AB02                                                              |
| <b>1133 Oxazolidine preparations</b>       | N03AC02                                                              |
| <b>1134 Barbituric acid preparation</b>    | N03AA02                                                              |
| <b>1135 Primidone preparations</b>         | N03AA03                                                              |
| <b>1136 Aminobutyric acid preparations</b> | N03AG03                                                              |
| <b>1137 Sulfonamide preparations</b>       | N03AX03                                                              |
| <b>1139 Other antiseizure medicine</b>     | N03AB52                                                              |
|                                            | N03AD01                                                              |
|                                            | N03AE01                                                              |
|                                            | N03AE01                                                              |
|                                            | N03AF03                                                              |
|                                            | N03AG01                                                              |
|                                            | N03AG04                                                              |
|                                            | N03AX09                                                              |
|                                            | N03AX11                                                              |
|                                            | N03AX14                                                              |
|                                            | N03AX14                                                              |
|                                            | N03AX15                                                              |
|                                            | N03AX17                                                              |
|                                            | N03AX18                                                              |
|                                            | N03AX22                                                              |
| N05BA09                                    |                                                                      |
| N05CD02                                    |                                                                      |
| N05CM11                                    |                                                                      |
| <b>2134 Carbonic anhydrase inhibitors</b>  | S01EC01                                                              |

**eTable 4.** List of Japan's original code of medical billing for name of disease related to epilepsy

| Name of disease                                          | Japan's original code for medical billing |
|----------------------------------------------------------|-------------------------------------------|
| Localized/focal epilepsy                                 | 3455005                                   |
| Focal sensory seizures                                   | 8834773                                   |
| Focal epilepsy                                           | 3455010                                   |
| Jacksonian eilepsy                                       | 3455001                                   |
| Autonomic nervous system epilepsy                        | 3458007                                   |
| Focal somatosensory seizure                              | 3458017                                   |
| Delayed epilepsy                                         | 3458024                                   |
| Auditory seizures                                        | 3458019                                   |
| Epilepsy simple partial epilepsy                         | 8846872                                   |
| Infant epilepsy with migratory focal seizure             | 8849555                                   |
| Medial temporal lobe epilepsy with hippocampal sclerosis | 8849521                                   |
| Psychomotor seizures                                     | 3454005                                   |
| Frontal lobe epilepsy                                    | 3451019                                   |
| Temporal lobe epilepsy                                   | 3454009                                   |
| Epileptic Automatism                                     | 8837937                                   |
| Epilepsy Complex Partial Seizures                        | 8846873                                   |
| Partial Epilepsy                                         | 8839840                                   |
| Absence                                                  | 3450002                                   |
| Tonic-clonic seizures                                    | 3451012                                   |
| Childhood Absence Seizure                                | 8834779                                   |
| Progressive myoclonus epilepsy                           | 8834977                                   |
| Juvenile Absence Epilepsy                                | 8835246                                   |
| Juvenile Myoclonic Epilepsy                              | 8835263                                   |
| Formal absence seizures                                  | 3450004                                   |
| West syndrome                                            | 3456001                                   |
| Ohtawara syndrome                                        | 8849520                                   |
| Early myoclonic encephalopathy                           | 8849542                                   |
| Point-blank epilepsy                                     | 3456004                                   |
| Dravet syndrome                                          | 8849546                                   |
| Infant Severe Myoclonic Epilepsy                         | 8847543                                   |
| Myoclonic absence epilepsy                               | 8849552                                   |
| Epilepsy with myoclonic weakness seizures                | 8849553                                   |
| Lennox-Gastaut Syndrome                                  | 8841171                                   |
| Unilateral convulsive hemiplegic epilepsy syndrome       | 8840001                                   |
| Refractory epilepsy                                      | 3458025                                   |
| Post-stroke epilepsy                                     | 3458023                                   |
| Landau-Kleffner syndrome                                 | 8840927                                   |
| Post-Encephalitis Epilepsy                               | 8846326                                   |
| Traumatic Epilepsy                                       | 9070002                                   |
| Early trauma epilepsy                                    | 9070012                                   |

**eTable 5.** List of the codes specified by the Ministry of Health, Labor and Welfare Japan for drugs which are applicable only to epilepsy

| <b>Japan's Ministry of Health, Labour and Welfare code for drugs</b> |
|----------------------------------------------------------------------|
| 1131001A1038                                                         |
| 1131001F1035                                                         |
| 1132001A1035                                                         |
| 1132002B1019                                                         |
| 1132002B1019                                                         |
| 1132002B1019                                                         |
| 1132002F1010                                                         |
| 1132002F1010                                                         |
| 1132002F1010                                                         |
| 1132002F2017                                                         |
| 1132002F2017                                                         |
| 1132002F2017                                                         |
| 1132002B1019                                                         |
| 1133002B1032                                                         |
| 1137001F1039                                                         |
| 1137001F2035                                                         |
| 1139001B1031                                                         |
| 1139001Q1042                                                         |
| 1139012F1023                                                         |
| 1139012F2020                                                         |
| 1139013B1026                                                         |
| 1139008C1020                                                         |
| 1139008F1027                                                         |
| 1139008F1035                                                         |
| 1139008F2023                                                         |
| 1139008F2031                                                         |
| 1139008F3020                                                         |
| 1139008F3038                                                         |
| 1139010F1024                                                         |
| 1139010F2020                                                         |
| 1139010R1020                                                         |
| 1139005B1013                                                         |
| 1139005B1048                                                         |
| 1139005F1015                                                         |
| 1139005F1023                                                         |
| 1139005B1013                                                         |
| 1139005B1030                                                         |
| 1139005F1015                                                         |
| 1139005F1015                                                         |
| 1139005F1031                                                         |
| 1139011M1028                                                         |
| 1139011R1025                                                         |
| 1139011R2021                                                         |
| 1139015F1027                                                         |
| 1139015F2023                                                         |
| 1139015R1023                                                         |
| 1139014F1022                                                         |
| 1139014F2029                                                         |
| 1126001X1014                                                         |
| 1126002X1019                                                         |

**eTable 6.** List of disease codes for which antiseizure medicine are not covered by Japanese health insurance system

| ICD-10           | Japan's original code for medical billing |
|------------------|-------------------------------------------|
| <b>B02</b>       | 8836919                                   |
|                  | 531012                                    |
| <b>E10 – E14</b> | 8845056                                   |
|                  | 8845085                                   |
|                  | 2505011                                   |
|                  | 8848768                                   |
| <b>G50</b>       | 3501002                                   |
|                  | 3501010                                   |
|                  | 8834074                                   |
|                  | 8834075                                   |
|                  | 8834076                                   |
|                  | 8834077                                   |
|                  | 8834078                                   |
|                  | 8834079                                   |
|                  | 8834702                                   |
|                  | 8835405                                   |
|                  | 3501025                                   |
|                  | 3501010                                   |
|                  | <b>G51</b>                                |
| 8832083          |                                           |
| <b>G64</b>       | 8846220                                   |
|                  | 8849550                                   |
| <b>G96</b>       | 8849545                                   |
|                  | 8849544                                   |
| <b>G98</b>       | 8847489                                   |
| <b>R52</b>       | 8847738                                   |
|                  | 7998003                                   |
|                  | 8847739                                   |
|                  | 8844739                                   |
|                  | 7890030                                   |
|                  | 8847802                                   |
| 8847821          |                                           |
| <b>M79</b>       | 8836065                                   |
| <b>G24</b>       | 8841457                                   |
|                  | 8841454                                   |
|                  | 8842320                                   |
|                  | 8842321                                   |
|                  | 8848454                                   |
|                  | 8841453                                   |
|                  | 8841455                                   |
|                  | 7235010                                   |
|                  | 8849222                                   |
|                  | 8833474                                   |
|                  | 8841404                                   |
|                  | 8841405                                   |
|                  | 8841452                                   |
|                  | 3338005                                   |
|                  | 8841345                                   |
|                  | 8848693                                   |
|                  | 8848707                                   |
|                  | 8848711                                   |
|                  | 8848731                                   |
|                  | 8835214                                   |
| 8841450          |                                           |
| <b>G25</b>       | 3335004                                   |
|                  | 3335007                                   |
|                  | 3335009                                   |
|                  | 8834822                                   |
|                  | 8836844                                   |
|                  | 8839823                                   |
|                  | 8841412                                   |
| 8841413          |                                           |
| 8845029          |                                           |
| <b>G43</b>       | 3461002                                   |
|                  | 8849148                                   |
|                  | 3460002                                   |
|                  | 8840019                                   |
|                  | 8849085                                   |
|                  | 8849143                                   |
|                  | 8849147                                   |
|                  | 8849178                                   |
|                  | 8849179                                   |
|                  | 8849180                                   |
|                  | 8849186                                   |
|                  | 8849306                                   |
|                  | 8835221                                   |
|                  | 8849199                                   |
|                  | 8832031                                   |
|                  | 8849198                                   |
|                  | 3468001                                   |
|                  | 8840640                                   |
|                  | 8849461                                   |
|                  | 3469004                                   |
| 8849213          |                                           |

ICD-10, International Classification of Diseases, 10th revision.

**eTable 7.** List of disease name codes for neurodevelopmental disorders

| ICD-10  | Japan's original code for medical billing |
|---------|-------------------------------------------|
| F80     | 8838167                                   |
|         | 8838964                                   |
|         | 8840884                                   |
|         | 8848327                                   |
|         | 8839413                                   |
|         | 7843001                                   |
|         | 8831489                                   |
|         | 8835369                                   |
|         | 8836301                                   |
|         | 8840927                                   |
|         | 8831346                                   |
|         | 3153007                                   |
|         | 7845002                                   |
|         | F81                                       |
| 8838169 |                                           |
| 8834868 |                                           |
| 8838168 |                                           |
| 3108001 |                                           |
| 8832912 |                                           |
| 8838963 |                                           |
| 3150001 |                                           |
| 8831871 |                                           |
| 8838171 |                                           |
| 8838966 |                                           |
| 8831870 |                                           |
| 8831872 |                                           |
| F82     |                                           |
|         | 3488016                                   |
|         | 8830803                                   |
|         | 8838962                                   |
| F90     | 3073008                                   |
|         | 8845700                                   |
|         | 8834784                                   |
|         | 8836993                                   |
| F91     | 8845643                                   |
|         | 8845724                                   |
|         | 8836883                                   |
|         | 8845670                                   |
|         | 8838999                                   |
|         | 3129003                                   |
|         | 8845675                                   |
| 8845696 |                                           |
| F92     | 8845739                                   |
|         | 3123001                                   |
|         | 8833333                                   |
| F93     | 8839903                                   |
|         | 8838255                                   |
|         | 8831243                                   |
|         | 3139001                                   |
| F94     | 8836121                                   |
|         | 8843354                                   |
|         | 8830159                                   |
|         | 8834364                                   |
|         | 8834781                                   |

ICD-10, International Classification of Diseases, 10th revision.

**eTable 8.** List of medical practice codes related to home psychotherapy for outpatients

| <b>Japan's original code for medical billing</b> |
|--------------------------------------------------|
| 180055510                                        |
| 180020410                                        |
| 180012210                                        |
| 180031010                                        |
| 180007250                                        |
| 180031210                                        |
| 180049130                                        |
| 180049230                                        |
| 180049330                                        |
| 180049830                                        |
| 180049930                                        |
| 180055970                                        |
| 180056030                                        |
| 180058530                                        |
| 188003310                                        |
| 188003410                                        |
| 188003670                                        |
| 188005110                                        |
| 188011110                                        |



**eTable 9.** List of drug codes for psychotropic drugs contraindicated for epileps

| <b>Japan's Ministry of Health, Labour and Welfare code for drugs</b> |
|----------------------------------------------------------------------|
| 1179017F1013                                                         |
| 1179017F1013                                                         |
| 1179017F1072                                                         |
| 1179017F2010                                                         |
| 1179017F2010                                                         |
| 1179017F2079                                                         |
| 1179017F1056                                                         |
| 1179017F2052                                                         |
| 1179008F1022                                                         |
| 1179008F2029                                                         |
| 1179008F1014                                                         |
| 1179008F1014                                                         |
| 1179008F2010                                                         |
| 1179008F2010                                                         |
| 1179008F3068                                                         |
| 1179023F1035                                                         |
| 1179023F2023                                                         |
| 1179023F3020                                                         |
| 1179049F1021                                                         |
| 1179049F2028                                                         |

**eTable 10.** List of medical practice codes for electroencephalography in epilepsy

| <b>Japan's original code for medical billing</b> |
|--------------------------------------------------|
| 160075570                                        |
| 160075610                                        |
| 160200510                                        |
| 160075750                                        |
| 160075850                                        |
| 160075950                                        |
| 160076050                                        |
| 160075310                                        |
| 160170610                                        |
| 160207510                                        |
| 160187010                                        |
| 160218410                                        |
| 160175810                                        |

**eTable 11.** List of drug codes of antiseizure medicine that should be avoided in cases of coexistence of mental disorders

| The Anatomical Therapeutic Chemical (ATC) Classification Code | Japan's Ministry of Health, Labour and Welfare code for drugs |
|---------------------------------------------------------------|---------------------------------------------------------------|
| N03AA02                                                       | 1125003B2015                                                  |
|                                                               | 1125003B2015                                                  |
|                                                               | 1125003B2031                                                  |
|                                                               | 1125003B2139                                                  |
|                                                               | 1125003B2163                                                  |
|                                                               | 1125003X1016                                                  |
|                                                               | 1125003X1016                                                  |
|                                                               | 1125003X1016                                                  |
|                                                               | 1125004F1023                                                  |
|                                                               | 1125004S1030                                                  |
| N03AA03                                                       | 1135002C1059                                                  |
|                                                               | 1135002F1055                                                  |
| N03AD01                                                       | 1139001B1031                                                  |
|                                                               | 1139001Q1042                                                  |
| N03AX11                                                       | 1139008C1020                                                  |
|                                                               | 1139008F1027                                                  |
|                                                               | 1139008F1035                                                  |
|                                                               | 1139008F2023                                                  |
|                                                               | 1139008F2031                                                  |
|                                                               | 1139008F3020                                                  |
|                                                               | 1139008F3038                                                  |
| N03AX14                                                       | 1139010F1024                                                  |
|                                                               | 1139010F2020                                                  |
|                                                               | 1139010R1020                                                  |
| N03AX15                                                       | 1139005B1013                                                  |
|                                                               | 1139005B1048                                                  |
|                                                               | 1139005F1015                                                  |
|                                                               | 1139005F1023                                                  |
|                                                               | 1139005B1013                                                  |
|                                                               | 1139005B1030                                                  |
|                                                               | 1139005F1015                                                  |
|                                                               | 1139005F1015                                                  |
|                                                               | 1139005F1031                                                  |

**eTable 12.** List of psychotropic drugs

| <b>The Anatomical Therapeutic Chemical (ATC) Classification Code</b> |
|----------------------------------------------------------------------|
| N05BE                                                                |
| N05AB02                                                              |
| N06AA04                                                              |
| N06AA07                                                              |
| N06AA17                                                              |
| N06AA10                                                              |
| N05BB01                                                              |
| N05AD05                                                              |
| N05BA21                                                              |
| N05AD01                                                              |
| N05AX11                                                              |
| N05BA19                                                              |
| N05AD                                                                |
| N05AD06                                                              |
| N05AX                                                                |
| N05AX08                                                              |
| N06AB08                                                              |
| N06AB05                                                              |
| N05AH04                                                              |
| N05AH03                                                              |
